# Supplementary material for: The Obesity Mortality Paradox in Patients with Pulmonary Embolism: Insights from a Tertiary Care Center
Source: MDPI journal article supplement (doi:10.3390/jcm13082375), 2024-04-19
Supplement: s1 [file s1]

Supplemental Table S1. Multivariable Cox-Proportional Hazards Model for the Association Between Obesity and 30-Day All-Cause Mortality

|                                                      | Hazard Ratio | P-value | 95% Confidence Interval |
|------------------------------------------------------|--------------|---------|-------------------------|
| Obesity (BMI $\geq$ 30 vs BMI 18.5 – 29.9)           | 0.25         | 0.004   | 0.10 – 0.64             |
| Male                                                 | 0.69         | 0.38    | 0.30 – 1.57             |
| Age (per 1 year)                                     | 1.01         | 0.56    | 0.98 – 1.04             |
| History of Heart Failure                             | 1.60         | 0.34    | 0.61 – 4.17             |
| History of Chronic Lung Disease                      | 1.49         | 0.37    | 0.62 – 3.56             |
| Recent COVID Infection                               | 1.52         | 0.59    | 0.34 – 6.87             |
| Systemic Thrombolysis                                | 1.69         | 0.45    | 0.44 – 6.54             |
|                                                      |              |         |                         |
| ESC Mortality Risk (Baseline: Intermediate-Low Risk) |              |         |                         |
| Intermediate-High Risk                               | 0.30         | 0.02    | 0.11 – 0.79             |
| High Risk                                            | 0.63         | 0.40    | 0.22 – 1.84             |

Supplemental Table S2. Multivariable Cox-Proportional Hazards Model for the Association Between BMI and 30-Day All-Cause Mortality

|                                                      | Hazard Ratio | P-value | 95% Confidence Interval |
|------------------------------------------------------|--------------|---------|-------------------------|
| BMI (per 1 kg/m <sup>2</sup> increase)               | 0.92         | 0.02    | 0.86 - 0.99             |
| Male                                                 | 0.76         | 0.52    | 0.32 - 1.77             |
| Age (per 1 year)                                     | 1.01         | 0.68    | 0.98 - 1.03             |
| History of Heart Failure                             | 1.72         | 0.27    | 0.65 - 4.56             |
| History of Chronic Lung Disease                      | 1.52         | 0.37    | 0.61 - 3.80             |
| Recent COVID Infection                               | 1.32         | 0.72    | 0.30 - 5.90             |
| Systemic Thrombolysis                                | 1.63         | 0.48    | 0.43 - 6.23             |
|                                                      |              |         |                         |
| ESC Mortality Risk (Baseline: Intermediate-Low Risk) |              |         |                         |
| Intermediate-High Risk                               | 0.37         | 0.054   | 0.14 - 1.02             |
| High Risk                                            | 0.63         | 0.41    | 0.20 - 1.92             |

Supplemental Table S3. Sensitivity Analysis: Multivariable Cox-Proportional Hazards Model for the Association Between Obesity and 30-Day PE-Related Mortality

|                                                      | Hazard Ratio | P-value | 95% Confidence Interval |
|------------------------------------------------------|--------------|---------|-------------------------|
| Obesity                                              | 0.29         | 0.04    | 0.09 - 0.94             |
| Male                                                 | 0.55         | 0.28    | 0.18 - 1.64             |
| Age (per 1 year)                                     | 1.02         | 0.28    | 0.98 - 1.06             |
| Systemic thrombolysis                                | 3.10         | 0.13    | 0.73 - 13.18            |
| History of heart failure                             | 1.92         | 0.27    | 0.60 - 6.11             |
| History of chronic lung disease                      | 2.04         | 0.19    | 0.70 - 5.95             |
| History of cancer                                    | 1.15         | 0.82    | 0.36 - 3.71             |
| COVID Infection                                      | 2.75         | 0.23    | 0.52 - 14.38            |
| Catheter thrombectomy                                | 1.19         | 0.76    | 0.39 - 3.64             |
|                                                      |              |         |                         |
| ESC Mortality Risk (Baseline: Intermediate-Low Risk) |              |         |                         |
| Intermediate-High Risk                               | 0.29         | 0.07    | 0.08 - 1.09             |
| High Risk                                            | 0.62         | 0.47    | 0.17 - 2.24             |

Supplemental Table S4. Sensitivity Analysis: Multivariable Cox-Proportional Hazards Model for the Association Between BMI and 30-Day PE-Related Mortality

|                                                      | Hazard Ratio | P-value | 95% Confidence Interval |
|------------------------------------------------------|--------------|---------|-------------------------|
| BMI (per 1 kg/m <sup>2</sup> )                       | 0.91         | 0.06    | 0.83 - 1.01             |
| Male                                                 | 0.56         | 0.34    | 0.17 - 1.83             |
| Age (per 1 year)                                     | 1.01         | 0.46    | 0.98 - 1.06             |
| Systemic Thrombolysis                                | 2.85         | 0.16    | 0.67 - 12.15            |
| History of Heart Failure                             | 2.31         | 0.18    | 0.67 - 7.92             |
| History of Chronic Lung Disease                      | 1.87         | 0.30    | 0.57 - 6.18             |
| Recent COVID Infection                               | 3.18         | 0.18    | 0.58 - 17.39            |
| Catheter Thrombectomy                                | 1.42         | 0.57    | 0.42 - 4.81             |
| History of cancer                                    | 1.53         | 0.53    | 0.41 - 5.66             |
|                                                      |              |         |                         |
| ESC Mortality Risk (Baseline: Intermediate-Low Risk) |              |         |                         |
| Intermediate-High Risk                               | 0.44         | 0.25    | 0.11 - 1.79             |
| High Risk                                            | 0.69         | 0.61    | 0.17 - 2.81             |
